1 Drug synergy of combinatory treatment with remdesivir and the repurposed drugs fluoxetine  
2 and itraconazole effectively impairs SARS-CoV-2 infection in vitro.

3 Sebastian Schloer<sup>1</sup>, Linda Brunotte<sup>2</sup>, Angeles Mecate-Zambrano<sup>2</sup>, Shuyu Zheng<sup>3</sup>, Jing  
4 Tang<sup>3</sup>, Stephan Ludwig<sup>2</sup>, Ursula Rescher<sup>1\*</sup>

5 <sup>1</sup>Institute of Medical Biochemistry, Center for Molecular Biology of Inflammation, and “Cells  
6 in Motion” Interfaculty Centre, University of Muenster, Von-Esmarch-Str. 56, D-48149,  
7 Muenster, Germany

8 <sup>2</sup>Institute of Molecular Virology, Center for Molecular Biology of Inflammation, and “Cells in  
9 Motion” Interfaculty Centre, University of Muenster, Von-Esmarch-Str. 56, D-48149,  
10 Muenster, Germany

11 <sup>3</sup>Research Program in Systems Oncology, Faculty of Medicine, University of Helsinki,  
12 Haartmaninkatu 8, 00029, Helsinki, Finland

13 \*Correspondence: Ursula Rescher, [rescher@uni-muenster.de](mailto:rescher@uni-muenster.de), Tel. +492518352118, Fax.  
14 +492518356748

15 running title: Combinatory drug treatment targeting both virus and host-factors to inhibit  
16 SARS-CoV-2 infection

## 17 **ABSTRACT**

18 The SARS-COV-2 pandemic and the global spread of coronavirus disease 2019  
19 (COVID-19) urgently calls for efficient and safe antiviral treatment strategies. A  
20 straightforward approach to speed up drug development at lower costs is drug repurposing.  
21 Here we investigated the therapeutic potential of targeting the host- SARS-CoV-2 interface  
22 via repurposing of clinically licensed drugs and evaluated their use in combinatory  
23 treatments with virus- and host-directed drugs. We tested the antiviral potential of  
24 repurposing the antifungal itraconazole and the antidepressant fluoxetine on the production  
25 of infectious SARS-CoV-2 particles in the polarized Calu-3 cell culture model and evaluated  
26 the added benefit of a combinatory use of these host-directed drugs with remdesivir, an  
27 inhibitor of viral RNA polymerase. Drug treatments were well-tolerated and potent impaired  
28 viral replication was observed with all drug treatments. Importantly, both

29 itraconazole-remdesivir and fluoxetine-remdesivir combinations inhibited the production of  
30 infectious SARS-CoV-2 particles > 90% and displayed synergistic effects in commonly used  
31 reference models for drug interaction. Itraconazole-Remdesivir and Fluoxetine-Remdesivir  
32 combinations are promising therapeutic options to control SARS-CoV-2 infection and severe  
33 progression of COVID-19.

## 34 **1. INTRODUCTION**

35 The zoonotic coronavirus SARS-CoV-2 and the resulting COVID-19 pandemic impressively  
36 show the global threat potential of a newly emerging pathogen. More than one million people  
37 have died so far from the current outbreak, and the proportion of infected people was  
38 estimated to reach more than 10% of the global population, with still unknown fatality rates  
39 (Baud et al., 2020; Rajgor et al., 2020; Wu et al., 2020). Because of the pressing burden on  
40 national health systems and economic losses, safe and efficient treatment strategies are  
41 urgently required. Developing a vaccine is a high priority. However, the rigorous testing and  
42 extensive clinical trials are time-consuming processes. While several trials are already  
43 ongoing, there are no vaccines available yet, and the required widespread access remains a  
44 challenging future task. Thus, approaches other than immunization might offer useful  
45 additional options for the management and control of SARS-CoV-2 infection and the  
46 treatment of COVID-19 (Fierabracci et al., 2020). A possibility to speed up the availability of  
47 drugs for the treatment of novel infections is the use of drugs that are already in clinical use  
48 for unrelated diseases via so-called "drug repurposing". This approach represents a  
49 promising strategy to identify antiviral drugs with faster clinical implementation and lower  
50 development costs, considerations that are especially important in the global COVID-19  
51 pandemic (Pushpakom et al., 2018). In addition to drugs that directly target the virus, host  
52 cell components that are vitally important in the viral life cycle are explored as promising  
53 starting points for therapeutic intervention ("host cell-directed therapy") (Schwegmann and  
54 Brombacher, 2008; lanevski et al., 2020; Zumla et al., 2020).

55 Although proteolytic cleavage of the SARS-CoV-2 spike protein surface protein by the host  
56 cell transmembrane protease serine 2 (TMPRSS2) enables SARS-CoV-2 to directly fuse  
57 with the plasma membrane, endocytosed SARS-CoV-2 particles use endosome-residing  
58 proteases for fusion within endosomes (Tang et al., 2020). Both pathways contribute to the  
59 SARS-CoV-2 infection process, and the preferential use of the actual fusion pathway might  
60 critically depend on the presence of plasma membrane proteases (Hoffmann et al., 2020).  
61 Our earlier research on influenza virus infection identified the late endosomal cholesterol  
62 balance as a critical factor in the influenza infection success and established this viral entry  
63 point as a possible pharmacological target. Elevated cholesterol levels inhibit the fusion of  
64 the influenza lipid hull with the endosomal membranes and thus inhibit the efficient transfer  
65 of the viral genome into the host cytosol (Musiol et al., 2013; Kühnl et al., 2018). We found  
66 that the clinically licensed antifungal itraconazole, a triazole derivative that blocks the fungal  
67 ergosterol pathway, has antiviral properties against a range of viruses and is effective  
68 against IAV infections in a preclinical mouse model (Schloer et al., 2019, 2020b). The  
69 additional therapeutic function is most likely based on direct inhibition of the endosomal  
70 cholesterol transporter Niemann-Pick Type C1 (NPC1) and the subsequent cholesterol  
71 storage ((Trinh et al., 2017; Schloer et al., 2019)).

72 The late endosome is an entry site for many zoonotically transmitted viruses, in particular for  
73 enveloped viruses including SARS-CoV-2 (Tang et al., 2020). Because of the functional  
74 similarities in transmitting the viral genome into the host cell, the same endosomal  
75 components might serve as pharmacological targets for a broad host-directed antiviral  
76 strategy against such viruses. Continuing our work on the endosomal host-virus interface,  
77 we explored whether a similar repurposing strategy could be used to impair SARS-CoV-2  
78 entry and infection. Therefore, we assessed clinically licensed drugs that also affect  
79 endolysosomal lipid storage and cholesterol build-up for their antiviral potential. Here we  
80 report that itraconazole treatment potently inhibited the production of SARS-CoV-2  
81 infectious particles. Together with our recently published work on the antiviral potential of the  
82 widely used serotonin inhibitor fluoxetine, which also negatively affects endosomal

cholesterol release (Kornhuber et al., 2010; Schloer et al., 2020a) on SARS-CoV-2 infection, the results presented in this study strongly argue for the endolysosomal host-SARs-CoV-2 interface as a druggable target. However, host-directed drugs will rather suppress infection than completely eradicate the pathogen. The resulting demand for high drug doses and early and prolonged treatment is often associated with poor patient compliance. While drugs directly acting on virus structures are much more likely to completely eliminate the pathogens in shorter treatment time, emerging viral resistance to these antivirals is a major concern, as observed with the influenza neuraminidase inhibitor oseltamivir (Kim et al., 2013). Thus, combination therapies using virus- and host-directed drugs are considered to overcome these shortcomings. The nucleoside analog remdesivir which was originally developed against Ebola (Warren et al., 2016), has antiviral properties with a broad spectrum of activity against a number of RNA viruses and has already been shown to be effective against SARS and Mers-CoV in animal experiments (Sheahan et al., 2017, 2020; Agostini et al., 2018; Pruijssers et al., 2020). When remdesivir is incorporated into the viral RNA, the synthesis is prematurely terminated, and viral replication is inhibited (Gordon et al., 2020). Therefore, we explored combined treatments with remdesivir and the repurposed drugs itraconazole and fluoxetine. Both drug combinations showed stronger antiviral activities against influenza viruses compared to remdesivir monotherapy (Schloer et al., 2020b). Importantly, the antiviral effects of the combined treatments deviated from the expected effects, and pharmacodynamic evaluation via commonly used reference models to study drug interaction revealed synergistic interaction.

## 2. MATERIALS AND METHODS

### 2.1 Cells and SARS-CoV-2 isolate

The human bronchial epithelial cell lines Calu-3 and the Vero E6 cells were cultivated in Dulbecco's modified Eagle's medium (DMEM) with 10% standardized fetal bovine serum (FBS Superior; Merck), 2 mM L-glutamine, 100 U/mL penicillin, 0.1 mg/mL streptomycin, and 1% non-essential amino acids (Merck) in a humidified incubator at 5% CO<sub>2</sub> and 37 °C. Calu-3 monolayers were polarized and cultured as described (Schloer et al., 2020b).

111 Itraconazole (2 mg/mL, Sigma), fluoxetine (5 mM, Sigma) and remdesivir (10 mM, Hycultec)  
112 were solubilized in DMSO. The SARS-CoV-2 isolate hCoV-19/Germany/FI1103201/2020  
113 (EPI-ISL\_463008, mutation D614G in spike protein) was amplified on Vero E6 cells and  
114 used for the infection assays.

## 115 **2.2 Cytotoxicity assay**

116 Calu-3 cells were cultured at the indicated concentrations with either the solvent DMSO,  
117 itraconazole or with the combinations of itraconazole/ remdesivir (ItraRem) or fluoxetine/  
118 remdesivir (FluoRem) for 48 h. Staurosporine solution (1  $\mu$ M) served as a positive control for  
119 cytotoxic effects. After 48 hours of treatment, cell viability was evaluated by adding MTT  
120 3-(4,5-dimethylthiazol-2-yl)-2,5-diphenyltetrazolium bromide (Sigma) to the cells for 4 h and  
121 OD<sub>562</sub> measurements according to the manufacturer's protocols (Sigma).

## 122 **2.3 Inoculation of cells and drug treatment**

123 For infection, polarized Calu-3 and Vero cells were washed with PBS and inoculated at a  
124 multiplicity of infection (MOI) of 0.1 (Calu-3) or 0.01 (Vero E6) of virus diluted in  
125 infection-PBS (containing 0.2% BSA, 1% CaCl<sub>2</sub>, 1% MgCl<sub>2</sub>, 100 U/mL penicillin and 0.1  
126 mg/mL streptomycin) at 37°C for 1 hours. Subsequently, cells were washed with PBS and  
127 further cultured in infection-DMEM (serum-free DMEM containing 0.2% BSA, 1 mM MgCl<sub>2</sub>,  
128 0.9 mM CaCl<sub>2</sub>, 100 U/mL penicillin, and 0.1 mg/mL streptomycin) at 5% CO<sub>2</sub> and 37 °C.  
129 Cells were treated with the indicated remdesivir, itraconazole or fluoxetine concentration 2  
130 hours post-infection (hpi) for the entire 48 hours infection period. After 48 hpi, apical culture  
131 supernatants were collected and immediately frozen at -80 °C until titration via plaque  
132 assay.

## 133 **2.4 Plaque assay**

134 To determine the number of infectious particles in the supernatant of treated cells, a  
135 standard plaque assay was performed. Briefly, Vero E6 cells grown to a monolayer in  
136 six-well dishes were washed with PBS and infected with serial dilutions of the respective  
137 supernatants in infection-PBS for 1 hour at 37 °C. The inoculum was replaced with 2x MEM

(MEM containing 0.2% BSA, 2 mM L-glutamine 1 M HEPES, pH 7.2, 7.5% NaHCO<sub>3</sub>, 100 U/mL penicillin, 0.1 mg/mL streptomycin, and 0.4% Oxoid agar) and incubated at 37°C. Virus plaques were visualized by staining with neutral red, and virus titers were calculated as plaque-forming units (PFU) per mL.

## 2.5 Data and statistical analysis

A priori power analysis using G\*Power 3.1 (Faul et al., 2007)) was performed to determine the sample sizes required to detect > 90% reduction in virus titers at powers > 0.8. Data were analyzed using the software GraphPad Prism version 8.00 (GraphPad). No outliers were detected.

Infectious viral titers are presented as means  $\pm$  SEM of five measurements per experiment per condition. For dose-response curves, drug concentrations were log-transformed and virus titers were expressed as percentages of the mean virus titer in control cells (treated with the solvent DMSO) and data were analyzed by curve fitting using a 4 parameter logistic model. Drug combinatory effects were analyzed by using SynergyFinder, an open-source free stand-alone web application for the analysis of drug combination data (Ianevski et al., 2017). Synergy was evaluated based on the Zero Interaction Potency (ZIP), Bliss independence, and Highest single agent (HSA) reference models (He et al., 2018). We further analyzed the overall drug combination sensitivity score (CSS) by using the CSS method (Malyutina et al., 2019).

## 3. RESULTS

### 3.1. The clinically licensed antifungal drug itraconazole efficiently blocks the production of SARS-CoV-2 infectious particles

Based on the successful use of repurposing itraconazole for the treatment of influenza virus infection reported in our earlier studies (Schloer et al., 2019, 2020b), we first established whether this clinically licensed drug also had an antiviral potential on the production of infectious SARS-CoV-2 particles. In line with our previous results (Schloer et al., 2020a), both Calu-3 and Vero E6 cell lines supported SARS-CoV-2 replication and produced high

165 virus titers (Fig. 1). Inoculation with the clinical isolate hCoV-19/Germany/FI1103201/2020  
166 at MOI 0.1 yielded  $1.46 \times 10^6$  PFU in Calu-3 cells and  $6.37 \times 10^6$  PFU at MOI 0.01 in Vero cells  
167 at 48 hpi. Treatment with itraconazole 2 hpi potently inhibited SARS-CoV-2 replication in a  
168 dose-dependent manner in both cell types (Fig. 1a). Fitting the experimental dose-response  
169 values to a nonlinear 4 parameter logistic model revealed half-maximal inhibitory ( $EC_{50}$ ) and  
170 90% inhibitory concentrations ( $EC_{90}$ ) of 0.43  $\mu$ M and 2.46  $\mu$ M in Calu-3 cells, and even lower  
171 50% and 90% inhibitory concentrations (0.39  $\mu$ M and 0.87  $\mu$ M) were determined for  
172 itraconazole antiviral activity in SARS-CoV-2 infected Vero cells (Fig. 1b). Of note, no  
173 detectable cytotoxicity was observed with these doses (Fig. S1a). The itraconazole cytotoxic  
174 concentration required to reduce cell viability by 50% ( $CC_{50}$ ) was determined at 25.56  $\mu$ M,  
175 resulting in a selectivity index (SI, defined as the ratio of  $CC_{50}$  to  $EC_{50}$ ) of 25.56  $\mu$ M which  
176 indicated an effective and safe antiviral window.

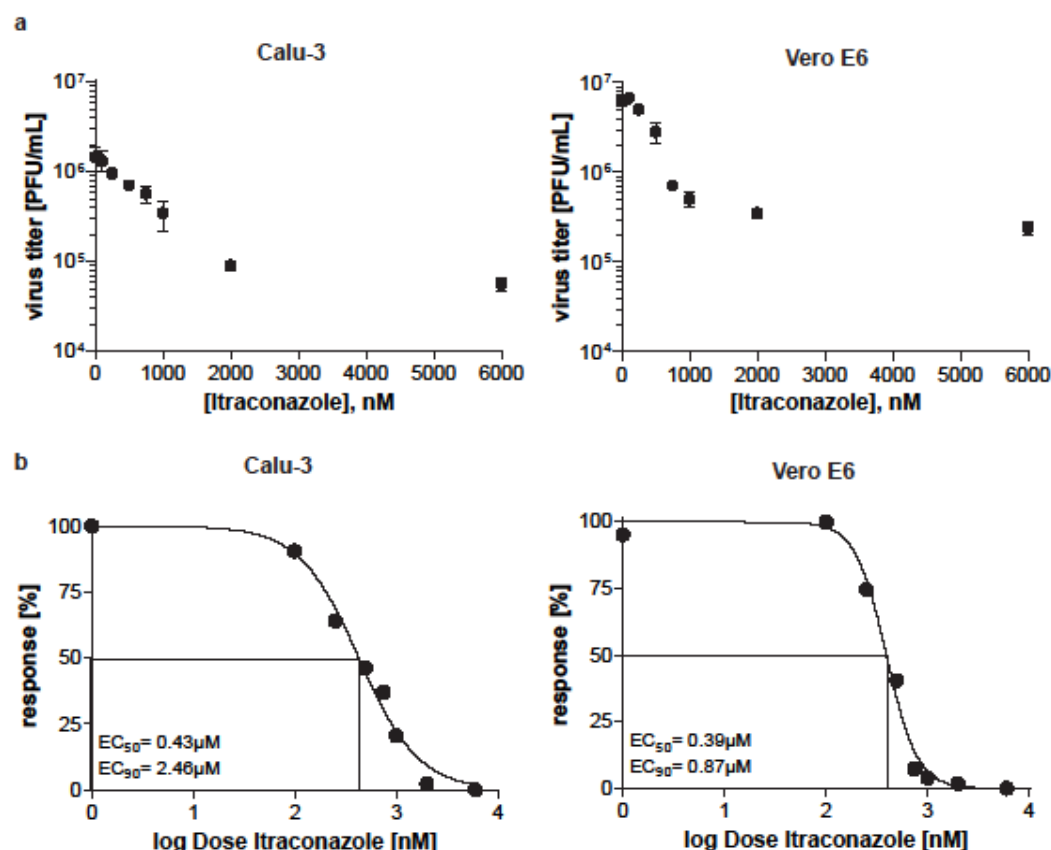

177 **FIGURE 1** Analysis of itraconazole-mediated reduction of SARS-CoV-2 replication. Calu-3  
178 and Vero E6 cells were infected with 0.1 MOI of SARS-CoV-2. At 2 hpi, cells were treated  
179 with itraconazole at the indicated concentrations. (a) Mean infectious viral titers  $\pm$  SEM,  
180

(b) Mean percent inhibition  $\pm$  SEM of SARS-CoV-2 replication, with mean virus titer in control cells (treated with the solvent DMSO) set to 100%;  $n = 5$ . LogEC<sub>50</sub> and LogEC<sub>90</sub> values were determined by fitting a non-linear regression model. (Calu-3: EC<sub>50</sub> = 0.43  $\mu$ M, EC<sub>90</sub> = 2.46  $\mu$ M; Vero E6: EC<sub>50</sub> = 0.39  $\mu$ M, EC<sub>90</sub> = 0.87  $\mu$ M).

### 3.2 Remdesivir inhibits SARS-CoV-2 replication in polarized Calu-3 cells

We addressed the question of whether a host-targeting drug could be used in combination with a virus-directed drug for more efficient suppression of SARS-CoV-2 replication. Thus, we first assessed the antiviral capacity of remdesivir, a nucleotide analog prodrug that inhibits SARS-CoV-2 viral RNA-dependent RNA polymerase (Gordon et al., 2020). The EC<sub>50</sub> concentration was reached at 0.42  $\mu$ M and EC<sub>90</sub> at 1.08  $\mu$ M in Calu-3 cells (Fig. S2), well in line with published data (Pruijssers et al., 2020). Next, we determined viral replication in cells that had been treated with combinatory therapy. Because we recently published the potential use of repurposing the antidepressant fluoxetine for treatment of SARS-CoV-2 infection (Schloer et al., 2020a), we also assessed the effects of a combined fluoxetine/remdesivir (FluoRem) treatment in addition to the itraconazole/remdesivir (ItraRem) combination (Fig. 2). Both drugs are clinically licensed and do not induce significant cytotoxicity over the whole concentration range ((Schloer et al., 2020a), and Fig. S1a). The combination treatments were also well-tolerated, and no cytotoxic effects were seen when cells were simultaneously treated with the drug pairs (Fig. S1b, c).

### 3.3 Combinatory treatments with the drug pairs itraconazole-remdesivir or fluoxetine-remdesivir show enhanced antiviral activity due to synergistic interaction

For all drugs, we chose those concentrations that were not sufficient to achieve a 90% reduction when individually applied (Fig 3a). For both ItraRem and FluoRem combinations, a potent reduction in virus titers was detected in all cases. Of note, several combinations yielded a reduction > 90% of the maximum virus titers produced in control cells (Fig. 3b).



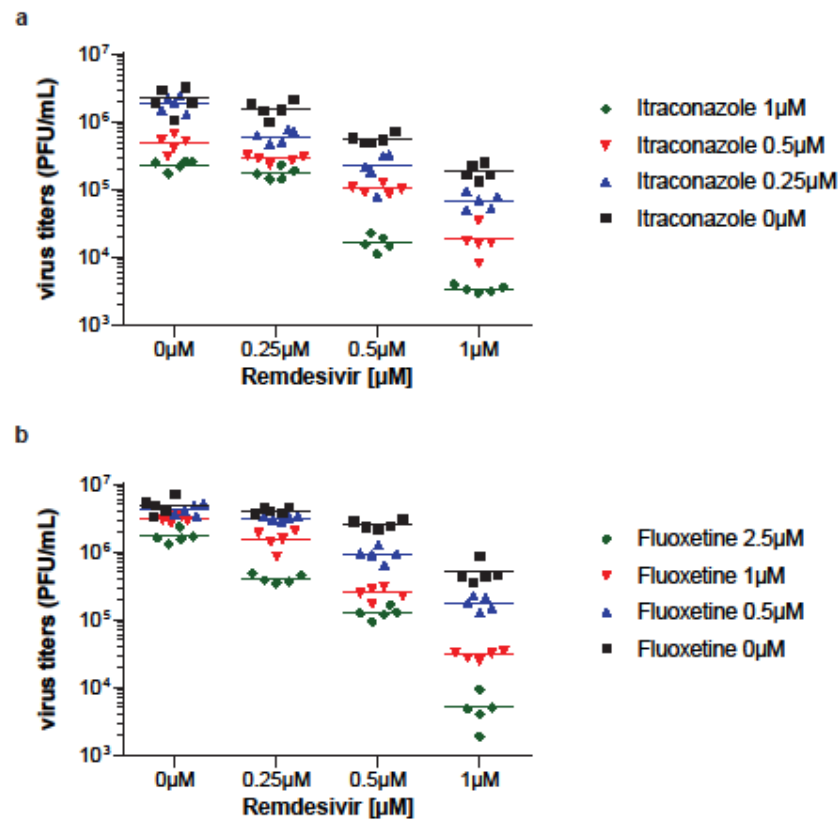

**FIGURE 2** Antiviral activities of treatments. Infectious virus production in Calu-3 cells treated as indicated 2 hpi. Each symbol represents plaque-forming units (PFU) per mL detected in a single experimental sample, lines indicate means.

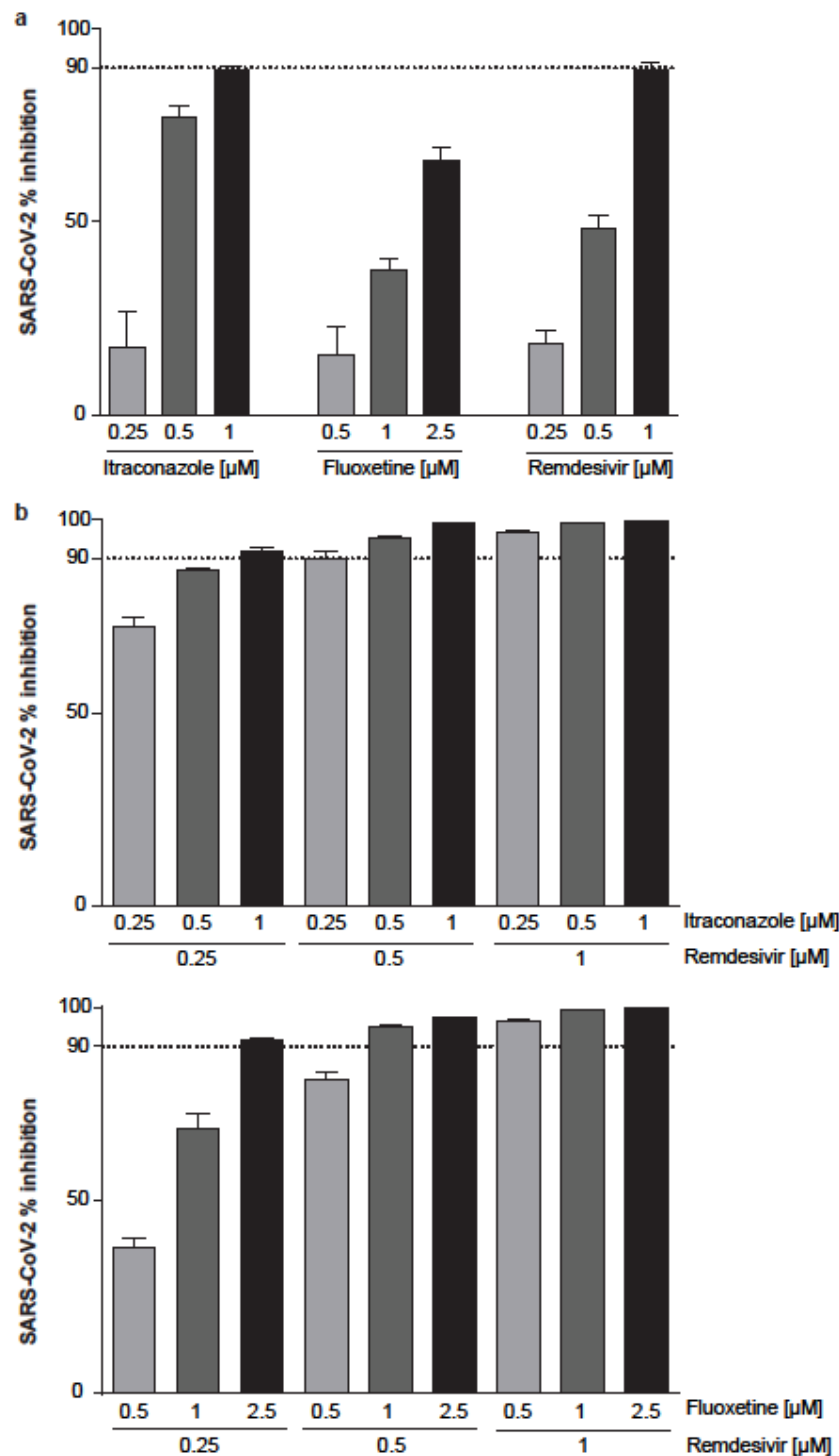

**FIGURE 3** Antiviral activities of single and combination treatments. Calu-3 cells were treated with the indicated drug combinations for 48 h. (a) Single treatment, (b) combinatory treatment. Bars represent mean percent inhibition  $\pm$  SEM of infectious virus production, with mean virus titer produced in control cells (treated with the solvent DMSO) set to 100%;  $n = 5$ . Dotted line, 90% reduction in viral titer.

216 We, next considered the pharmacological interactions of the respective drug pairs. Thus, we  
 217 evaluated the drug interactions via Bliss independence, Highest single agent (HSA), and  
 218 ZIP, three commonly used reference synergy models that differ in their basic assumptions of  
 219 drug interaction they are based on. The results, presented in Figs. 4 and 5, consistently  
 220 argued for synergistic action of remdesivir with itraconazole and fluoxetine, as indicated by  
 221 the positive average synergy score across all models. Closer inspection of the drug  
 222 interaction relationships and landscape visualizations revealed that for ItraRem, the highest  
 223 synergy scores were calculated with the lower concentration ranges of both drugs (Fig. 4).  
 224 The strong synergy led to an overall drug combination sensitivity score (CSS) of 89.64,  
 225 resulting in >90% inhibition already at 500 nM of remdesivir and 250 nM of itraconazole.  
 226 FluoRem combination treatment had a higher average synergy score, as well as a higher  
 227 CSS score than ItraRem (92.82 vs 89.64), suggesting that this drug combination is more  
 228 likely to show synergy. Importantly, for all models, the FluoRem combinations that met the  $\geq$   
 229 90% inhibition criterion were well within the high synergy area (Fig. 5).

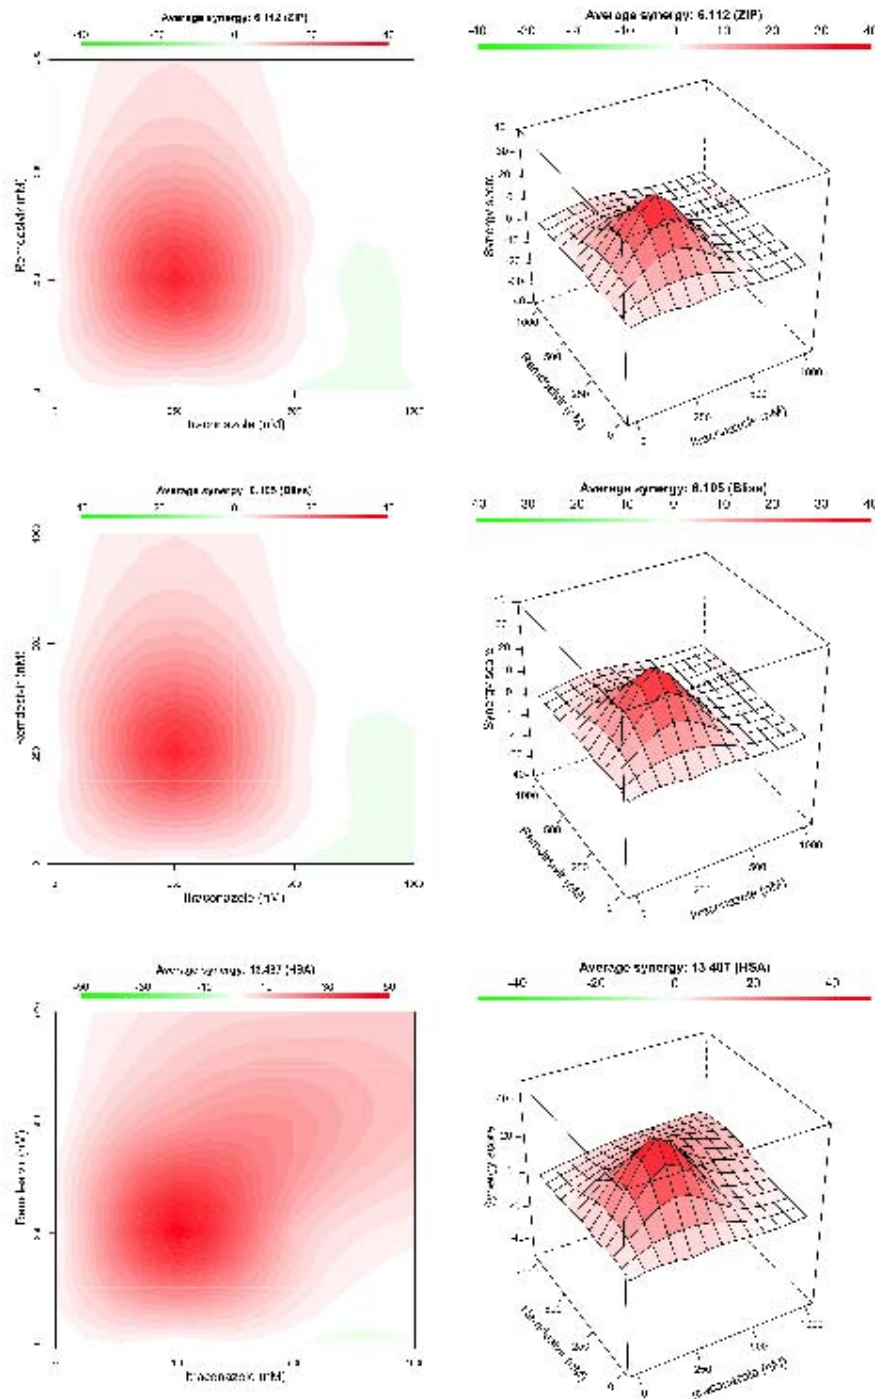

**Figure**

**FIGURE 4.** Evaluation of the pharmacological interactions of itraconazole and remdesivir (ItraRem). ZIP, Bliss independence, and Highest single agent (HSA) reference models were used to assess the interaction landscapes. Interaction surfaces are color-coded according to the synergy scores of the responses.

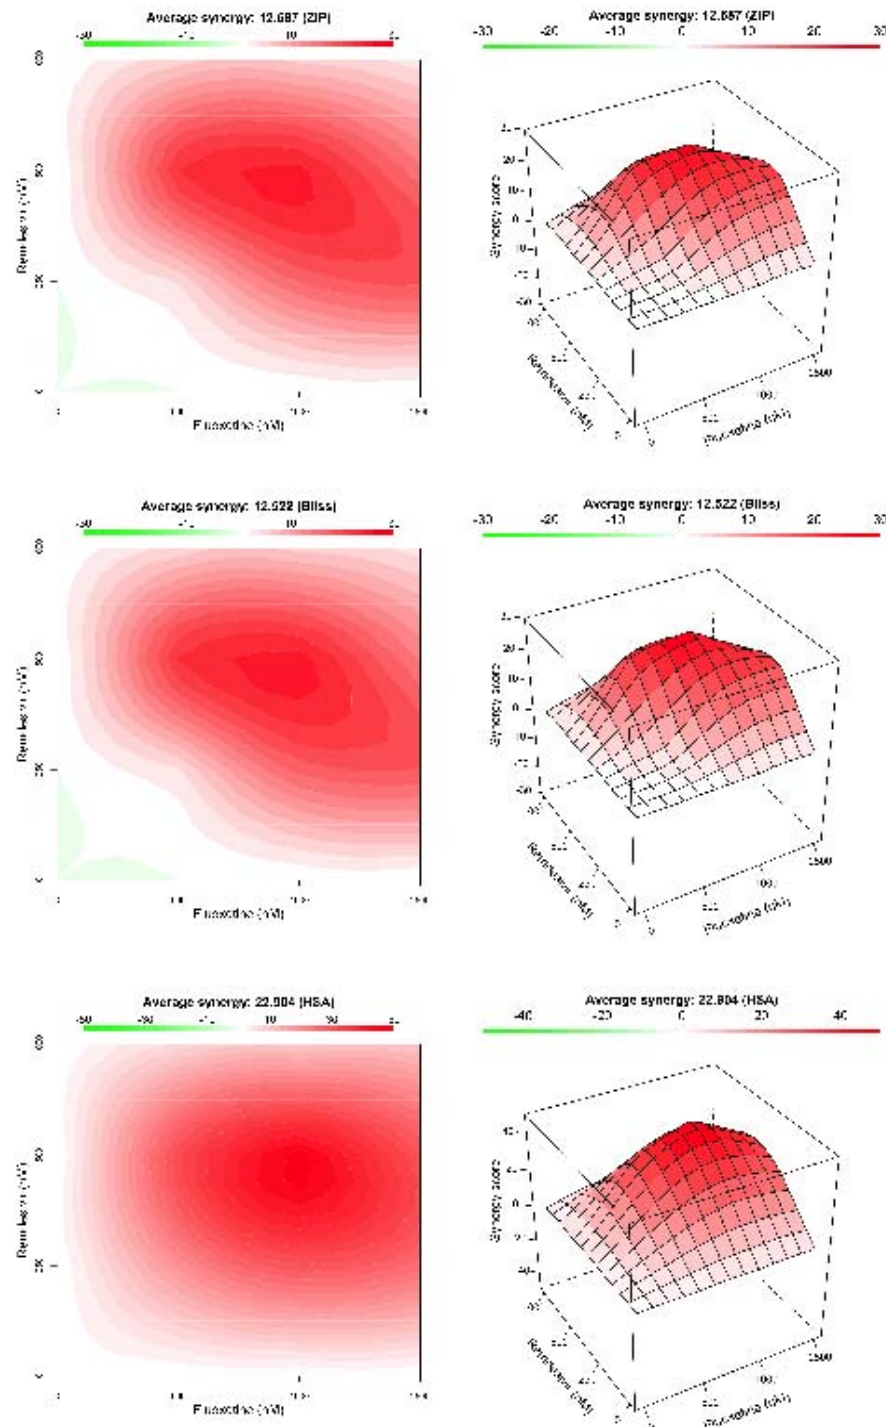

**FIGURE 5.** Evaluation of the pharmacological interactions of fluoxetine and remdesivir (FluoRem). ZIP, Bliss independence, and Highest single agent (HSA) reference models were used to assess the interaction landscapes. Interaction surfaces are color-coded according to the synergy scores of the responses.

#### 4. DISCUSSION

241 The nucleoside analog remdesivir with broad-spectrum antiviral activity against a range of  
 242 viruses including Ebola, Marburg, MERS, and SARS inhibits viral RNA polymerase and is  
 243 also active against SARS-CoV-2 (Warren et al., 2016; Sheahan et al., 2017, 2020; Agostini  
 244 et al., 2018; Brown et al., 2019). Indeed, remdesivir was the first new drug to receive an  
 245 FDA emergency use authorization for the treatment of severe COVID-19 cases. However, a  
 246 common concern about virus-directed antivirals is the development of drug resistance. Due  
 247 to their error-prone replication mode, drug-resistant viruses are increasingly encountered  
 248 (Strasfeld and Chou, 2010), as observed with the influenza neuraminidase inhibitor  
 249 oseltamivir (Kim et al., 2013). Because profound changes would be required to allow viruses  
 250 to replicate independently of otherwise essential host factors, the development of  
 251 host-directed therapeutics is an emerging concept. However, host-directed drugs will rather  
 252 cause impaired viral replication than complete eradication, thus demanding high drug  
 253 concentrations and starting treatment start as early as possible and for extended durations,  
 254 which is often associated with poor patient compliance. Because of these shortcomings,  
 255 combinatory treatments with both virus- and host-directed drugs are explored for enhanced  
 256 treatment success.

257 Enveloped viruses such as SARS-CoV-2 depend on the fusion of their lipid hull with the host  
 258 membrane to get access to the cytosol. The SARS-CoV-2 spike protein, which protrudes  
 259 from the virus surface, mediates initial binding to angiotensin-converting enzyme 2 (ACE2),  
 260 which serves as the host cell surface receptor (Li et al., 2003; Lan et al., 2020; Ou et al.,  
 261 2020; Zhou et al., 2020). To promote fusion with the host cell membrane, the spike protein  
 262 needs to be primed by proteolytic cleavage, which can be mediated by several host  
 263 proteases. Transmembrane protease serine 2 (TMPRSS2)-mediated cleavage leads to  
 264 fusion with the plasma membrane, while endosome-residing proteases are utilized by  
 265 endocytosed SARS-CoV-2 particles for fusion within endosomes. Since both routes have  
 266 been reported to contribute to the SARS-CoV-2 infectivity (Hoffmann et al., 2020), the  
 267 endosomal compartment is also a critical host/pathogen interface for SARS-CoV-2. Our  
 268 previous studies strongly support the late endosomal cholesterol balance as a cellular target

for antiviral intervention (Musiol et al., 2013; Kühnl et al., 2018; Schloer et al., 2019, 2020a, 2020b). Notably, endolysosomal lipid storage and cholesterol build-up could be induced via repurposing of drugs approved for unrelated applications. We found that the triazole derivative itraconazole, a clinically licensed antifungal drug (Organization, 2019) that directly inhibits the endosomal cholesterol transporter NPC1 (Trinh et al., 2017) has an antiviral potential on the endosomal fusion of enveloped viruses including influenza viruses (Schloer et al., 2019). The findings presented in this study add SARS-CoV-2 to the spectrum of itraconazole-sensitive enveloped viruses. Our results reveal a potent antiviral activity of itraconazole on the production of SARS-CoV-2 infectious particles, with  $EC_{50}$  values comparable to what we previously reported for itraconazole-mediated antiviral activity against IAV subtypes. The bioavailability after oral application of itraconazole is low because of the low water solubility of this compound (Grant Prentice and Glasmacher, 2005; Domínguez-Gil Hurlé et al., 2006). Only limited amounts are absorbed from the gastrointestinal tract after ionization, and levels depend on the individual gastric acidity (Shin et al., 2004; Domínguez-Gil Hurlé et al., 2006; Bae et al., 2011; Lestner and Hope, 2013; Allegra et al., 2017). However, our previous study revealed a beneficial antiviral activity in vivo (Schloer et al., 2019).

We recently discovered that the widely used antidepressant fluoxetine has strong SARS-CoV-2 antiviral activity (Schloer et al., 2020a). Together with the findings presented here on the inhibitory function of itraconazole treatment on SARS-CoV-2 replication, these results suggest that both drugs are promising candidates for repurposing as a host-directed drug for SARS-CoV-2 infection treatment. Both drugs most likely interfere with the proper endosomal cholesterol levels. Whereas itraconazole und posaconazole both directly inhibit the endosomal cholesterol transporter NPC1 (Trinh et al., 2017), fluoxetine functionally blocks the endolysosome-residing enzyme sphingomyelin phosphodiesterase ("acid sphingomyelinase", ASM), which in turn causes sphingomyelin accumulation and negatively affects cholesterol release from this compartment (Kornhuber et al., 2010).



## 296 **5. CONCLUSION**

297 While remdesivir and the host-directed drugs itraconazole or fluoxetine target independent  
298 pathways, we found that drug combinations together with remdesivir (ItraRem and  
299 FluoRem) showed stronger antiviral activities against SARS-CoV-2 than the remdesivir  
300 monotherapy. Moreover, the overall therapeutic effect of the combinations was larger than  
301 the expected sum of the independent drug effects. Our analysis on the antiviral activity of  
302 combinatory drug combinations via commonly used interaction models argue for an  
303 enhanced efficacy that is based on synergistic drug interaction and suggests promising  
304 novel options for SARS-CoV-2 treatment.

## 305 **ACKNOWLEDGEMENTS**

306 We thank Jonathan Hentrey for help with the plaque assays.

## 307 **FUNDING**

308 This research was funded by grants from the German Research Foundation (DFG),  
309 CRC1009 “Breaking Barriers”, Project A06 (to U.R.) and B02 (to S.L.), CRC 1348 “Dynamic  
310 Cellular Interfaces”, Project A11 (to U.R.), DFG Lu477/23-1 (to S.L.), the European  
311 Research Council No. 716063 (to SZ and JT), the Academy of Finland No. 317680 (to SZ  
312 and JT), the Interdisciplinary Center for Clinical Research (IZKF) of the Münster Medical  
313 School, grant number Re2/022/20 (to U.R.) and from the Innovative Medizinische  
314 Forschung (IMF) of the Münster Medical School, grant number SC121912 (to S.S.). S.S.,  
315 S.L., and U.R. are members of the German FluResearchNet, a nationwide research network  
316 on zoonotic influenza.

## 317 **CONFLICT OF INTEREST**

318 The authors declare no conflict of interest. The funders had no role in the design of the  
319 study; in the collection, analyses, or interpretation of data; in the writing of the manuscript, or  
320 in the decision to publish the results.

## 321 **AUTHOR CONTRIBUTIONS**



322 Conceptualization and methodology, S.S., U.R.; validation, formal analysis, investigation,  
323 data curation, S.S., J.T., U.R.; resources, J.T., S.L.; U.R.; writing—original draft preparation,  
324 U.R.; writing—review and editing, S.S., S.L., U.R.; visualization, S.S.; supervision, U.R.,  
325 S.L., project administration, U.R.; funding acquisition, U.R. All authors have read and agreed  
326 to the published version of the manuscript.

## 327 REFERENCES

328 Agostini, M.L., Andres, E.L., Sims, A.C., Graham, R.L., Sheahan, T.P., Lu, X., et al. (2018).  
329 Coronavirus susceptibility to the antiviral remdesivir (GS-5734) is mediated by the viral  
330 polymerase and the proofreading exoribonuclease. *MBio* 9: 2020.

331 Allegra, S., Fatiguso, G., Francia, S. De, Favata, F., Pirro, E., Carcieri, C., et al. (2017).  
332 Evaluation of posaconazole pharmacokinetics in adult patients with invasive fungal  
333 infection. *Biomedicines* 5.

334 Bae, S.K., Park, S.-J., Shim, E.-J., Mun, J.-H., Kim, E.-Y., Shin, J.-G., et al. (2011).  
335 Increased Oral Bioavailability of Itraconazole and Its Active Metabolite,  
336 7-Hydroxyitraconazole, When Coadministered With a Vitamin C Beverage in Healthy  
337 Participants. *J. Clin. Pharmacol.* 51: 444–451.

338 Baud, D., Qi, X., Nielsen-Saines, K., Musso, D., Pomar, L., and Favre, G. (2020). Real  
339 estimates of mortality following COVID-19 infection. *Lancet Infect. Dis.* 20: 773.

340 Brown, A.J., Won, J.J., Graham, R.L., Dinnon, K.H., Sims, A.C., Feng, J.Y., et al. (2019).  
341 Broad spectrum antiviral remdesivir inhibits human endemic and zoonotic  
342 deltacoronaviruses with a highly divergent RNA dependent RNA polymerase. *Antiviral*  
343 *Res.* 169.

344 Domínguez-Gil Hurlé, A., Sánchez Navarro, A., and García Sánchez, M.J. (2006).  
345 Therapeutic drug monitoring of itraconazole and the relevance of pharmacokinetic  
346 interactions. *Clin. Microbiol. Infect.* 12: 97–106.

347 Faul, F., Erdfelder, E., Lang, A.-G., and Buchner, A. (2007). G\*Power 3: A flexible statistical  
348 power analysis program for the social, behavioral, and biomedical sciences. *Behav.*  
349 *Res. Methods* 39: 175–191.

350 Fierabracci, A., Arena, A., and Rossi, P. (2020). COVID-19: A review on diagnosis,  
351 treatment, and prophylaxis. *Int. J. Mol. Sci.* 21: 1–16.

352 Gordon, C.J., Tchesnokov, E.P., Woolner, E., Perry, J.K., Feng, J.Y., Porter, D.P., et al.  
353 (2020). Remdesivir is a direct-acting antiviral that inhibits RNA-dependent RNA  
354 polymerase from severe acute respiratory syndrome coronavirus 2 with high potency. *J.*  
355 *Biol. Chem.* 295: 6785–6797.

356 Grant Prentice, A., and Glasmacher, A. (2005). Making sense of itraconazole  
357 pharmacokinetics. *J. Antimicrob. Chemother.* 56: 17–22.

358 He, L., Kuleskiy, E., Saarela, J., Turunen, L., Wennerberg, K., Aittokallio, T., et al. (2018).  
359 Methods for high-throughput drug combination screening and synergy scoring. In  
360 *Methods in Molecular Biology*, (Humana Press Inc.), pp 351–398.

361 Hoffmann, M., Kleine-Weber, H., Schroeder, S., Krüger, N., Herrler, T., Erichsen, S., et al.  
362 (2020). SARS-CoV-2 Cell Entry Depends on ACE2 and TMPRSS2 and Is Blocked by a  
363 Clinically Proven Protease Inhibitor. *Cell* 181: 271–280.e8.

364 Ianevski, A., He, L., Aittokallio, T., and Tang, J. (2017). SynergyFinder: A web application for  
365 analyzing drug combination dose-response matrix data. *Bioinformatics* 33: 2413–2415.

366 Ianevski, A., Yao, R., Fenstad, M.H., Biza, S., Zusinaite, E., Reisberg, T., et al. (2020).  
367 Potential antiviral options against SARS-CoV-2 infection. *Viruses* 12:.

368 Kim, J.H., Resende, R., Wennekes, T., Chen, H.M., Bance, N., Buchini, S., et al. (2013).  
369 Mechanism-based covalent neuraminidase inhibitors with broad-spectrum influenza  
370 antiviral activity. *Science (80-. ).* 340: 71–75.

371 Kornhuber, J., Tripal, P., Reichel, M., Mühle, C., Rhein, C., Muehlbacher, M., et al. (2010).  
372 Functional Inhibitors of Acid Sphingomyelinase (FIASMs): A Novel Pharmacological  
373 Group of Drugs with Broad Clinical Applications.

374 Kühnl, A., Musiol, A., Heitzig, N., Johnson, D.E., Ehrhardt, C., Grewal, T., et al. (2018). Late  
375 endosomal/lysosomal cholesterol accumulation is a host cell-protective mechanism  
376 inhibiting endosomal release of influenza A virus. *MBio* 9: e01345-18.

377 Lan, J., Ge, J., Yu, J., Shan, S., Zhou, H., Fan, S., et al. (2020). Structure of the  
378 SARS-CoV-2 spike receptor-binding domain bound to the ACE2 receptor. *Nature* 581:  
379 215–220.

380 Lestner, J., and Hope, W.W. (2013). Itraconazole: An update on pharmacology and clinical  
381 use for treatment of invasive and allergic fungal infections. *Expert Opin. Drug Metab.*  
382 *Toxicol.* 9: 911–926.

383 Li, W., Moore, M.J., Vasllieva, N., Sui, J., Wong, S.K., Berne, M.A., et al. (2003).  
384 Angiotensin-converting enzyme 2 is a functional receptor for the SARS coronavirus.  
385 *Nature* 426: 450–454.

386 Malyutina, A., Majumder, M.M., Wang, W., Pessia, A., Heckman, C.A., and Tang, J. (2019).  
387 Drug combination sensitivity scoring facilitates the discovery of synergistic and  
388 efficacious drug combinations in cancer. *PLoS Comput. Biol.* 15:.

389 Musiol, A., Gran, S., Ehrhardt, C., Ludwig, S., Grewal, T., Gerke, V., et al. (2013). Annexin  
390 A6-balanced late endosomal cholesterol controls influenza a replication and  
391 propagation. *MBio* 4: 1–11.

392 Organization, W.H. (2019). World Health Organization Model List of Essential Medicines  
393 (Geneve).

394 Ou, X., Liu, Y., Lei, X., Li, P., Mi, D., Ren, L., et al. (2020). Characterization of spike

glycoprotein of SARS-CoV-2 on virus entry and its immune cross-reactivity with SARS-CoV. *Nat. Commun.* 11: 1–12.

Pruijssers, A.J., George, A.S., Schäfer, A., Leist, S.R., Gralinski, L.E., Dinnon, K.H., et al. (2020). Remdesivir Inhibits SARS-CoV-2 in Human Lung Cells and Chimeric SARS-CoV Expressing the SARS-CoV-2 RNA Polymerase in Mice. *Cell Rep.* 32: 107940.

Pushpakom, S., Iorio, F., Eyers, P.A., Escott, K.J., Hopper, S., Wells, A., et al. (2018). Drug repurposing: Progress, challenges and recommendations. *Nat. Rev. Drug Discov.* 18: 41–58.

Rajgor, D.D., Lee, M.H., Archuleta, S., Bagdasarian, N., and Quek, S.C. (2020). The many estimates of the COVID-19 case fatality rate. *Lancet Infect. Dis.* 20: 776–777.

Schloer, S., Brunotte, L., Goretzko, J., Mecate-Zambrano, A., Korthals, N., Gerke, V., et al. (2020a). Targeting the endolysosomal host-SARS-CoV-2 interface by clinically licensed functional inhibitors of acid sphingomyelinase (FIASMA) including the antidepressant fluoxetine. *Emerg. Microbes Infect.* 1–26.

Schloer, S., Goretzko, J., Kühnl, A., Brunotte, L., Ludwig, S., and Rescher, U. (2019). The clinically licensed antifungal drug itraconazole inhibits influenza virus *in vitro* and *in vivo*. *Emerg. Microbes Infect.* 8: 80–93.

Schloer, S., Goretzko, J., Pleschka, S., Ludwig, S., and Rescher, U. (2020b). Combinatory Treatment with Oseltamivir and Itraconazole Targeting Both Virus and Host Factors in Influenza A Virus Infection. *Viruses* 12: 703.

Schwegmann, A., and Brombacher, F. (2008). Host-directed drug targeting of factors hijacked by pathogens. *Sci. Signal.* 1: re8.

Sheahan, T.P., Sims, A.C., Graham, R.L., Menachery, V.D., Gralinski, L.E., Case, J.B., et al.

419 (2017). Broad-spectrum antiviral GS-5734 inhibits both epidemic and zoonotic  
420 coronaviruses. *Sci. Transl. Med.* 9.

421 Sheahan, T.P., Sims, A.C., Leist, S.R., Schäfer, A., Won, J., Brown, A.J., et al. (2020).  
422 Comparative therapeutic efficacy of remdesivir and combination lopinavir, ritonavir, and  
423 interferon beta against MERS-CoV. *Nat. Commun.* 11: 1–14.

424 Shin, J.H., Choi, K.Y., Kim, Y.C., and Lee, M.G. (2004). Dose-Dependent Pharmacokinetics  
425 of Itraconazole after Intravenous or Oral Administration to Rats: Intestinal First-Pass  
426 Effect. *Antimicrob. Agents Chemother.* 48: 1756–1762.

427 Strasfeld, L., and Chou, S. (2010). Antiviral drug resistance: Mechanisms and clinical  
428 implications. *Infect. Dis. Clin. North Am.* 24: 809–833.

429 Tang, T., Bidon, M., Jaimes, J.A., Whittaker, G.R., and Daniel, S. (2020). Coronavirus  
430 membrane fusion mechanism offers a potential target for antiviral development.  
431 *Antiviral Res.* 178.

432 Trinh, M.N., Lu, F., Li, X., Das, A., Liang, Q., Brabander, J.K. De, et al. (2017). Triazoles  
433 inhibit cholesterol export from lysosomes by binding to NPC1. *Proc. Natl. Acad. Sci.*  
434 114: 89–94.

435 Warren, T.K., Jordan, R., Lo, M.K., Ray, A.S., Mackman, R.L., Soloveva, V., et al. (2016).  
436 Therapeutic efficacy of the small molecule GS-5734 against Ebola virus in rhesus  
437 monkeys. *Nature* 531: 381–385.

438 Wu, J.T., Leung, K., Bushman, M., Kishore, N., Niehus, R., Salazar, P.M. de, et al. (2020).  
439 Estimating clinical severity of COVID-19 from the transmission dynamics in Wuhan,  
440 China. *Nat. Med.* 26: 506–510.

441 Zhou, P., Yang, X. Lou, Wang, X.G., Hu, B., Zhang, L., Zhang, W., et al. (2020). A  
442 pneumonia outbreak associated with a new coronavirus of probable bat origin. *Nature*

443 579: 270–273.

444 Zumla, A., Hui, D.S., Azhar, E.I., Memish, Z.A., and Maeurer, M. (2020). Reducing mortality  
445 from 2019-nCoV: host-directed therapies should be an option. *Lancet* 395: e35–e36.

446 **SUPPORTING INFORMATION**

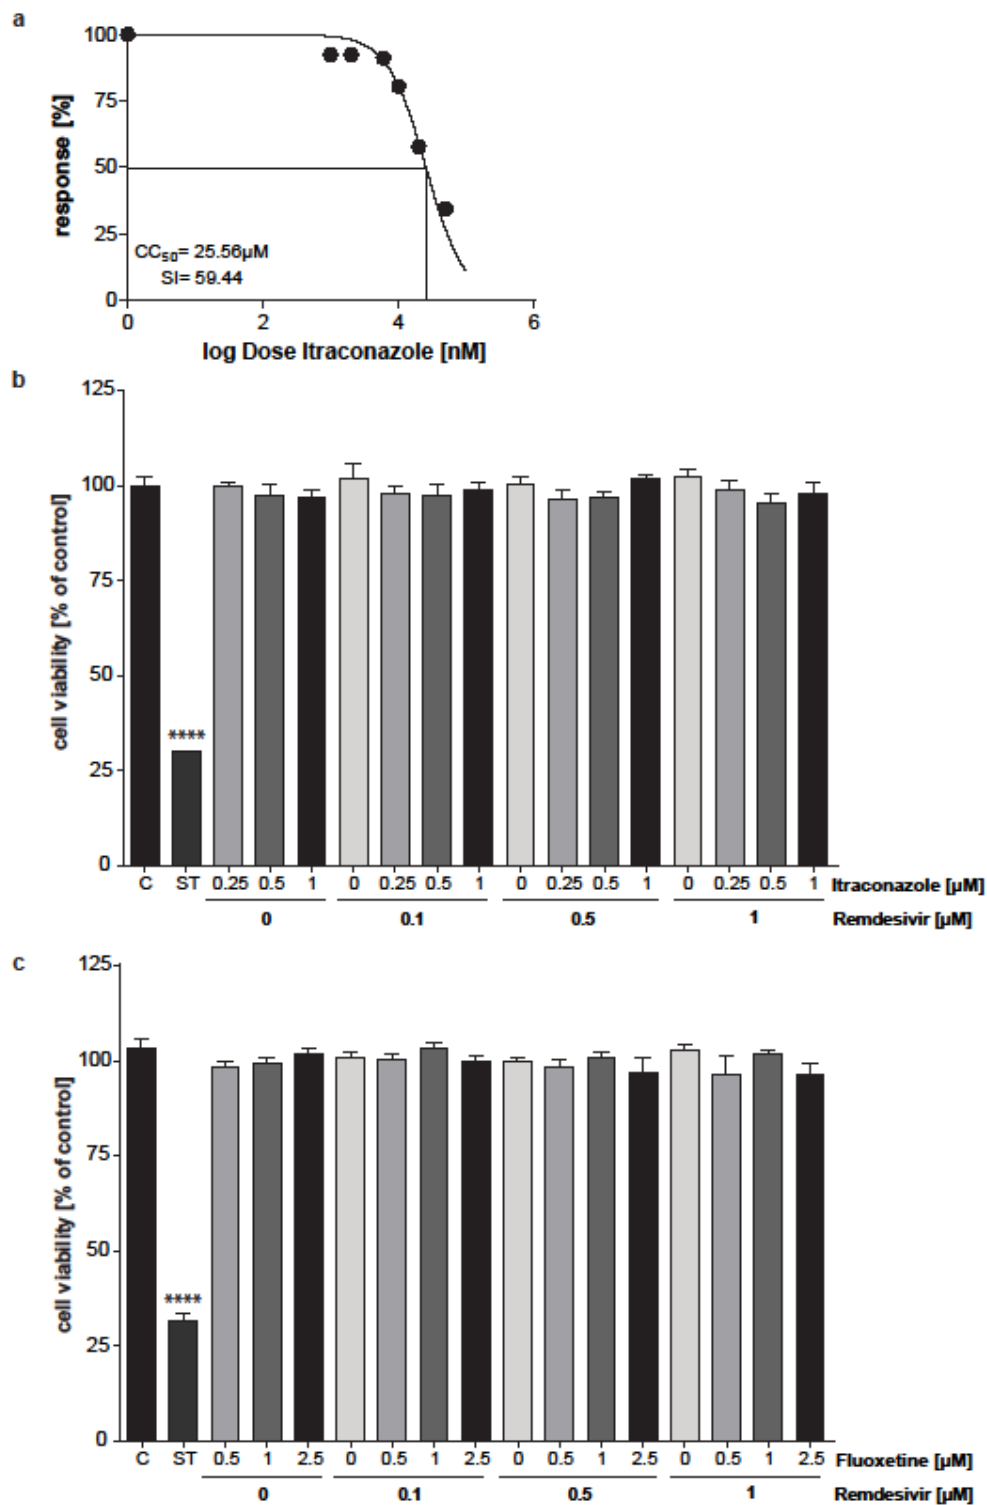

**SUPPORTING FIGURE 1** Analysis of the cytotoxicity of treatments. (a) Itraconazole, (b) ItraRem, and (c) FluoRem combinatory treatment. Calu-3 cells were treated with the

indicated drug combinations for 48 h. Bars display mean percentages of viable cells  $\pm$  SEM, with mean viability in solvent-treated control cells (C) set to 100%. Staurosporine (ST)- induced cytotoxicity served as a positive control.  $n=5$ , one-way ANOVA followed by Dunnett's multiple comparison test, \*\*\*\* $p < 0.0001$ .

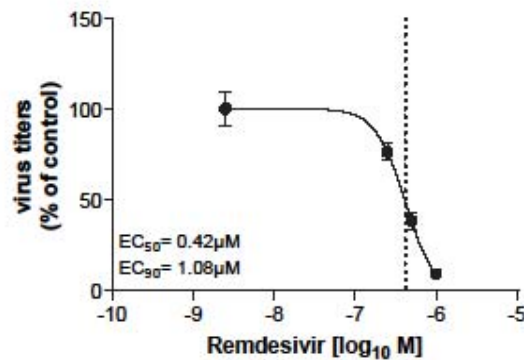

454

**SUPPORTING FIGURE 2** Analysis Dose-Response curve of remdesivir treatments in Calu-3 cells. Calu-3 cells were infected with 0.1 MOI of SARS-CoV-2 for 1 h and treated with the indicated drug combinations for 48 h. Mean percent inhibition  $\pm$  SEM of SARS-CoV-2 replication, with mean virus titer in control cells (treated with the solvent DMSO) set to 100%;  $n=5$ . LogEC<sub>50</sub> and LogEC<sub>90</sub> values were determined by fitting a non-linear regression model. (Calu-3: EC<sub>50</sub> = 0.42  $\mu$ M, EC<sub>90</sub> = 1.08  $\mu$ M).
